# Supplementary material for: In Vivo Targeted Metabolomic Profiling of Prostanit, a Novel Anti-PAD NO-Donating Alprostadil-Based Drug
Source: PubMed Central journal article supplement (PMC7764275; doi:10.3390/molecules25245896), 2020-12-13
Supplement: molecules-25-05896-s001.pdf [file molecules-25-05896-s001.pdf]

Table S1. LC-MS/MS parameters for Prostanite® metabolites

Chromatographic separation was conducted at 40°C using Acquity UPLC BEN C18 2.1 x 100 mm 1.7µm. The mobile phases were 0.1% formic acid aqueous solution (solvent A) and acetonitrile with 0.1% formic acid (solvent B) with the following gradient program: 0 min (15% B), 15 min (60% B), 20 min (95% B), 25 min (95% B), 25.1 min (20% B), equilibration up to 30 min. Total run time for each analysis was 30 min with the injection volume of the sample 5 µl. The ionization method was employed in negative ESI mode. Capillary voltage was 2.5 kV, Source Temperature was 150°C, Desolvation Gas Temperature was 600°C and Desolvation Gas Flow 1000 L/Hr. Multiple reaction-monitoring mode (MRM) parameters were in table S1.

|                                        | Retention Time | Precursor Ion | Product Ion | Cone Voltage | Collision Energy |
|----------------------------------------|----------------|---------------|-------------|--------------|------------------|
| 1,3-DNG                                | 3.75           | 227.1         | 62          | 15           | 5                |
| Teriflunomide (IS)                     | 10.25          | 269.1         | 82.1        | 30           | 20               |
| PGB <sub>1</sub>                       | 11.90          | 335.2         | 317.2       | 35           | 22               |
| PGA <sub>1</sub>                       | 11.63          | 335.3         | 317.3       | 35           | 15               |
| 15-keto-PGE <sub>1</sub>               | 8.94           | 351.3         | 237.1       | 35           | 23               |
| PGE <sub>1</sub>                       | 10.80          | 353.2         | 273.2       | 35           | 16               |
| 13,14-dehydro-15-keto-PGE <sub>1</sub> | 8.90           | 353.3         | 335.2       | 35           | 28               |
| PGE <sub>1</sub> -1,3-glycerol         | 3.75           | 473.2         | 391.1       | 20           | 20               |

Table S2. Retention time and MRM parameters for purine and pyrimidine profiling

Targeted determination of purine metabolites was carried according to parameters presented below. Chromatographic separation was operated at 40°C using PFP Discovery® HS F5 HPLC Column 15cmx\*2.1mm\*3 µm (ThermoFinnigan, USA) with mobile phases consisting of 0.1% formic acid aqueous solution (solvent A) and acetonitrile (solvent B). The gradient program was: 0-2 min (0%B); 2-5 min (25%B); 5-10 min (95%B); 10-15min (95%B); 15-15.1 (0%B); 15.1-22 (0%B); equilibration up to 22.1 min. Mass spectra were obtained at MRM mode (Supplementary Table 4). Capillary voltage was 1 kV, Source Temperature was 150°C, Desolvation Temperature was 500°C and Desolvation Gas Flow 1000 L/Hr.

|                        | Retention Time | Precursor Ion | Product Ion | Cone Voltage | Collision Energy |
|------------------------|----------------|---------------|-------------|--------------|------------------|
| γ-Aminobutyric acid    | 3.14           | 104           | 87          | 13           | 10               |
| α-Aminobutyric acid    | 2.68           | 104           | 58          | 13           | 10               |
| 2-Aminoisobutyric acid | 2.76           | 104           | 58          | 13           | 10               |
| 3-Aminoisobutyric acid | 1.99           | 104           | 86          | 10           | 10               |
| Uracil                 | 5.80           | 113           | 70          | 26           | 15               |
| Thymine                | 6.27           | 127           | 110         | 27           | 15               |
| Ureidopropionic acid   | 2.90           | 133           | 115         | 11           | 10               |
| Adenine                | 5.34           | 136           | 119         | 35           | 20               |
| Guanine                | 4.55           | 152           | 135         | 25           | 18               |
| Xanthine               | 4.25           | 153           | 110         | 30           | 15               |
| Ureidosuccinic acid    | 2.57           | 117           | 136         | 5            | 10               |
| Xanthurenic acid       | 7.83           | 206           | 132         | 10           | 15               |
| Thymidine              | 6.27           | 243           | 127         | 18           | 13               |
| Cytidine               | 4.94           | 244           | 112         | 23           | 12               |
| Uridine                | 4.25           | 245           | 113         | 23           | 10               |
| Deoxyadenosine         | 6.62           | 252           | 135         | 27           | 15               |
| Adenosine              | 6.34           | 268           | 136         | 30           | 15               |
| Deoxyguanosine         | 6.12           | 268           | 152         | 20           | 10               |
| Inosine                | 5.85           | 269           | 137         | 20           | 15               |
| Guanosine              | 5.94           | 284           | 152         | 18           | 20               |
| Orotic acid            | 3.04           | 155           | 111         | 10           | 5                |
| Uric acid              | 3.33           | 167           | 124         | 26           | 16               |
| Deoxyuridine           | 5.80           | 227           | 184         | 22           | 12               |
| Fluorouracil (IS)      | 4.65           | 131           | 114         | 15           | 15               |

Table S3. Retention time and MRM parameters for steroid profiling

Identification of steroid metabolites were made both in negative and positive ESI modes. Chromatographic separation was achieved at 40°C using Waters ACQUITY UPLC CSH C18 column 1.7 µm (Waters, USA) with mobile phases consisting of 2.5 mM HCOONH<sub>4</sub> aqueous solution (solvent A) and methanol (solvent B). The gradient program was as follows: 0.1 min – 30% B, 14 min – 90% B, 16 min – 90% B, 16,1 min – 30% B, equilibration up to 25 min with total run time 25 min. Injection volume of the sample was 3 µl. Mass spectra were obtained in MRM mode (Supplementary Table 3). Nitrogen was used as collision gas. Capillary voltage was 1 kV, Source Temperature was 150°C, Desolvation Temperature was 500°C and Desolvation Gas Flow 1000 L/Hr.

|                         | Retention Time | Precursor Ion | Product Ion | Cone Voltage | Collision Energy |
|-------------------------|----------------|---------------|-------------|--------------|------------------|
| Melatonin               | 2.92           | 233           | 174.2       | 35           | 10               |
| Androsterone            | 10.88          | 273.1         | 255.3       | 35           | 20               |
| Androstendione          | 8.19           | 287.2         | 97          | 35           | 15               |
| 6-OH-Androsterone       | 8.07           | 289           | 151         | 35           | 10               |
| DHEA                    | 9.23           | 289.1         | 271.1       | 35           | 10               |
| Testosterone            | 8.80           | 289.2         | 97          | 35           | 20               |
| Methyltestosterone (IS) | 9.43           | 303           | 97          | 35           | 20               |
| Progesterone            | 10.60          | 315.1         | 97.2        | 35           | 20               |
| Deoxycorticosterone     | 9.14           | 331.2         | 97.2        | 35           | 15               |
| 17-OH-Progesterone      | 7.35           | 331.2         | 97          | 35           | 20               |
| Corticosterone          | 7.51           | 347.1         | 121.2       | 35           | 22               |
| 11-DC                   | 7.35           | 347.2         | 97          | 35           | 25               |
| 21-DC                   | 5.64           | 347.2         | 311.2       | 35           | 22               |
| Cortison                | 6.16           | 361.2         | 163.1       | 35           | 20               |
| Cortisol                | 8.09           | 363.2         | 121         | 35           | 24               |

Table S4. Retention time and MRM parameters for amino acid profiling

PFP Discovery® HS F5 HPLC Column 15cmx\*2.1mm\*3 µm (ThermoFinnigan, USA) was used for chromatographic separation. The oven temperature was set at 40°C. The gradient elution involved a mobile phase consisted of 0.1% formic acid aqueous solution (solvent A) and acetonitrile (solvent B). The elution program was as follows: 0 -5min (0% B), then 15 min (40%), 20,1 min (100%), 25 min (100% B), 25.1 min (20% B), equilibration up to 35 min. Mass spectra were obtained at MRM mode with transitions presented in Supplementary Table 5. Capillary voltage was 1 kV, Source Temperature was 150°C, Desolvation Temperature was 500°C and Desolvation Gas Flow 1000 L/Hr.

|                   | Retention Time | Precursor Ion | Product Ion | Cone Voltage | Collision Energy |
|-------------------|----------------|---------------|-------------|--------------|------------------|
| Glycine           | 3.99           | 76            | 30          | 15           | 15               |
| Alanine           | 2.20           | 90            | 44          | 15           | 12               |
| Serine            | 2.01           | 106           | 60          | 15           | 13               |
| Proline           | 2.52           | 116           | 70          | 15           | 15               |
| Valine            | 3.71           | 118           | 72          | 15           | 12               |
| Threonine         | 2.14           | 120           | 56          | 15           | 15               |
| Pyroglu           | 3.67           | 130           | 84          | 17           | 15               |
| 4-Hydroxyproline  | 6.85           | 132           | 86          | 15           | 14               |
| Leucine           | 6.53           | 132           | 86          | 15           | 12               |
| Isoleucine        | 6.53           | 132           | 86          | 15           | 16               |
| Ornithine         | 6.53           | 133           | 70          | 15           | 15               |
| Aspartate         | 2.02           | 134           | 74          | 15           | 15               |
| Lysine            | 2.10           | 147           | 84          | 15           | 17               |
| Glutamate         | 2.20           | 148           | 84          | 15           | 15               |
| Methioine         | 4.26           | 150           | 56          | 15           | 17               |
| Histidine         | 2.50           | 156           | 110         | 15           | 15               |
| Phenylalanine     | 8.82           | 166           | 120         | 15           | 17               |
| 1-Methylhistidine | 2.54           | 170           | 126         | 15           | 15               |
| Arginine          | 2.71           | 175           | 70          | 15           | 15               |
| Tyrosine          | 6.32           | 183           | 81          | 15           | 29               |
| DOPA              | 7.61           | 198           | 152         | 15           | 14               |
| Tryptophan        | 6.28           | 206           | 188         | 15           | 10               |
| Carnosine         | 8.85           | 227           | 110         | 15           | 25               |

Table S5. Validation parameters for the studied metabolites

To evaluate the matrix effect in the experiment, chromatographic peak areas of each analyte from the spike after extraction samples at low and high concentration levels were compared to the neat standards at the same concentrations. Percent nominal concentrations estimated were within the acceptable limits (86.7 – 101.5 %) after evaluating six different lots of plasma. The same evaluation was performed on IS and no significant peak area differences were observed. Thus, ion suppression or enhancement from plasma matrix was negligible for this method. Mean extraction recoveries were more than 94.6 % for all analytes. Observed effects were consistent and reproducible. The method showed good consistency throughout the entire standard concentration ranges.

Stability studies were performed for stock and working solutions of all analytes. The results revealed that all analytes were stable in stock and working solutions for 24 h at room temperature of about 25 °C; for 60 h in the autosampler at 10 °C and in refrigerator at +4 °C – +8 °C.

| Target compound                        | Linearity (ng/mL) | R <sup>2</sup> | LLOQ | Intra-day precision | Inter-day precision | % Recovery, ±RSD |
|----------------------------------------|-------------------|----------------|------|---------------------|---------------------|------------------|
| 1,3-DNG                                | 0.5-100 ng/mL     | 0.9885         | 0.5  | 14.1                | 14.5                | 85               |
| PGB <sub>1</sub>                       | 0.1-100 ng/mL     | 0.9923         | 0.1  | 10.2                | 9.8                 | 91               |
| PGA <sub>1</sub>                       | 0.1-100 ng/mL     | 0.9914         | 0.1  | 9.6                 | 4.5                 | 94               |
| 15-keto-PGE <sub>2</sub>               | 0.1-100 ng/mL     | 0.9947         | 0.1  | 12.1                | 7.8                 | 96               |
| 13,14-dihydro-15-keto-PGE <sub>2</sub> | 0.1-100 ng/mL     | 0.9915         | 0.1  | 5.6                 | 6.5                 | 92               |
| PGE <sub>2</sub>                       | 0.1-100 ng/mL     | 0.9954         | 0.1  | 3.5                 | 8.9                 | 94               |
| 15-keto-PGE <sub>1</sub>               | 0.1-100 ng/mL     | 0.9948         | 0.1  | 4.5                 | 9.7                 | 91               |
| PGF <sub>2a</sub>                      | 0.1-100 ng/mL     | 0.9945         | 0.1  | 5.8                 | 7.1                 | 87               |
| PGE <sub>1</sub>                       | 0.1-100 ng/mL     | 0.9919         | 0.1  | 4.5                 | 6.3                 | 93               |
| 13,14-dehydro-15-keto-PGE <sub>1</sub> | 0.1-100 ng/mL     | 0.9901         | 0.1  | 12.2                | 13.7                | 97               |
| PGE <sub>1</sub> -1,3-glycelol         | 0.5-100 ng/mL     | 0.9825         | 0.5  | 13.4                | 14.3                | 88               |
| γ-Aminobutyric acid                    | 0.2-100 ng/mL     | 0.9813         | 0.2  | 11.4                | 16.5                | 91               |

|                             |                    |        |      |       |      |     |
|-----------------------------|--------------------|--------|------|-------|------|-----|
| $\alpha$ -Aminobutyric acid | 0.2-100<br>ng/mL   | 0.9942 | 0.2  | 10.1  | 11.4 | 94  |
| 2-Aminoisobutyric acid      | 0.2-100<br>ng/mL   | 0.9918 | 0.2  | 11.1  | 12.5 | 92  |
| 3-Aminoisobutyric acid      | 0.2-100<br>ng/mL   | 0.9923 | 0.2  | 12.4  | 13.1 | 93  |
| Uracil                      | 1-100<br>ng/mL     | 0.9814 | 1    | 12.66 | 13.1 | 93  |
| Thymine                     | 1-100<br>ng/mL     | 0.9942 | 1    | 11.56 | 12.6 | 91  |
| Ureidopropioic acid         | 1-100<br>ng/mL     | 0.9912 | 1    | 9.14  | 8.6  | 93  |
| Adenine                     | 1-100<br>ng/mL     | 0.9923 | 1    | 4.5   | 5.1  | 99. |
| Guanine                     | 1-100<br>ng/mL     | 0.9941 | 1    | 5.6   | 8.3  | 100 |
| Xanthine                    | 1-100<br>ng/mL     | 0.9947 | 1    | 14.2  | 11.8 | 94  |
| Ureidosuccinic acid         | 1-100<br>ng/mL     | 0.9958 | 1    | 13.2  | 14.5 | 88  |
| Xanthurenic acid            | 1-100<br>ng/mL     | 0.9946 | 1    | 11.8  | 12.4 | 87  |
| Thymidine                   | 1-100<br>ng/mL     | 0.9975 | 1    | 8.9   | 14.7 | 97  |
| Cytidine                    | 1-100<br>ng/mL     | 0.9975 | 1    | 5.6   | 12.0 | 98  |
| Uridine                     | 1-100<br>ng/mL     | 0.9815 | 1    | 11.3  | 11.5 | 97  |
| Deoxyadenosine              | 1-100<br>ng/mL     | 0.9863 | 1    | 12.7  | 13.7 | 87  |
| Adenosine                   | 1 -<br>100 ng/mL   | 0.9845 | 1    | 13.5  | 11.0 | 96  |
| Deoxyguanosine              | 1-100<br>ng/mL     | 0.9812 | 1    | 12.1  | 10.8 | 97  |
| Inosine                     | 1-100<br>ng/mL     | 0.9687 | 1    | 13.8  | 9.8  | 99  |
| Guanosine                   | 1 -100<br>ng/mL    | 0.9845 | 1    | 11.4  | 10.3 | 94  |
| Orotic acid                 | 10-1000<br>ng/mL   | 0.9824 | 1    | 5.1   | 6.3  | 95  |
| Uric acid                   | 10-1000<br>ng/mL   | 0.9848 | 1    | 4.8   | 5.9  | 96  |
| $\gamma$ -Aminobutyric acid | 1-100<br>ng/mL     | 0.9948 | 1    | 10.2  | 10.6 | 85  |
| Melatonin                   | 0.05 -100<br>ng/mL | 0.9912 | 0,05 | 12.8  | 14.8 | 89  |
| Androsterone                | 0.01-100<br>ng/mL  | 0.9914 | 0.01 | 6.2   | 13.5 | 95  |
| Androstendione              | 0.01-100<br>ng/mL  | 0.9855 | 0.01 |       |      |     |

|                     |                   |        |      |      |       |     |
|---------------------|-------------------|--------|------|------|-------|-----|
| DHEA                | 0.01-100<br>ng/mL | 0.9814 | 0.01 | 14.1 | 14.8  | 89  |
| Testosterone        | 0.01-100<br>ng/mL | 0.9985 | 0.01 | 6.8  | 7.0   | 94  |
| Deoxycorticosterone | 0.01-100<br>ng/mL | 0.9942 | 0.01 | 7.2  | 8.1   | 95  |
| 17-OH-Progesterone  | 0.01-100<br>ng/mL | 0.9947 | 0.01 | 4.1  | 5.6   | 98  |
| Corticosterone      | 0.01-100<br>ng/mL | 0.9946 | 0.01 | 8.6  | 13.1  | 89  |
| 11-DC               | 0.01-100<br>ng/mL | 0.9913 | 0.01 | 3.8  | 7.5   | 95  |
| 21-DC               | 0.01-100<br>ng/mL | 0.9921 | 0.01 | 4.6  | 9.1   | 93  |
| Cortison            | 0.01-100<br>ng/mL | 0.9984 | 0.01 | 1.2  | 6.5   | 98  |
| Cortisol            | 0.01-100<br>ng/mL | 0.9946 | 0.01 | 13.7 | 10.4  | 93  |
| Glycine             | 1-1000<br>nmol/ml | 0.9874 | 1    | 6.12 | 6.39  | 99  |
| Alanine             | 1-1000<br>nmol/ml | 0.9874 | 1    | 2.74 | 12.25 | 97  |
| Serine              | 1-1000<br>nmol/ml | 0.9914 | 1    | 1.13 | 12.53 | 97  |
| Proline             | 1-1000<br>nmol/ml | 0.9975 | 1    | 1.09 | 1.29  | 99  |
| Valine              | 1-1000<br>nmol/ml | 0.9846 | 1    | 2.18 | 5.40  | 98  |
| Threonine           | 1-1000<br>nmol/ml | 0.9845 | 1    | 6.53 | 4.30  | 99  |
| Pyroglu             | 1-1000<br>nmol/ml | 0.9845 | 1    | 6.74 | 9.66  | 97  |
| 4-Hydroxyproline    | 1-1000<br>nmol/ml | 0.9913 | 1    | 8.86 | 4.33  | 103 |
| Leucine             | 1-1000<br>nmol/ml | 0.9844 | 1    | 5.51 | 6.06  | 96  |
| Isoleucine          | 1-1000<br>nmol/ml | 0.9913 | 1    | 4.18 | 2.24  | 94  |
| Ornithine           | 1-1000<br>nmol/ml | 0.9988 | 1    | 9.82 | 7.09  | 105 |
| Aspartate           | 1-1000<br>nmol/ml | 0.9989 | 1    | 2.29 | 4.49  | 104 |
| Lysine              | 1-1000<br>nmol/ml | 0.9933 | 1    | 2.77 | 4.67  | 98  |
| Glutamate           | 1-1000<br>nmol/ml | 0.9936 | 1    | 5.44 | 12.54 | 93  |

|               |                   |        |   |       |       |     |
|---------------|-------------------|--------|---|-------|-------|-----|
| Methioine     | 1-1000<br>nmol/ml | 0.9979 | 1 | 6.56  | 9.27  | 92  |
| Histidine     | 1-1000<br>nmol/ml | 0.9965 | 1 | 4.86  | 2.07  | 94  |
| Phenylalanine | 1-1000<br>nmol/ml | 0.9914 | 1 | 5.43  | 11.75 | 95  |
| Arginine      | 1-1000<br>nmol/ml | 0.9814 | 1 | 13.49 | 7.65  | 103 |
| Tyrosine      | 1-1000<br>nmol/ml | 0.9923 | 1 | 6.40  | 7.62  | 108 |
| DOPA          | 1-100<br>nmol/ml  | 0.9945 | 1 | 8.86  | 4.33  | 95  |
| Tryptophan    | 1-1000<br>nmol/ml | 0.9807 | 1 | 5.51  | 6.06  | 94  |
| Carnosine     | 1-1000<br>nmol/ml | 0.9801 | 1 | 4.18  | 2.24  | 88  |

Table S6. The reaction of Prostanit® and PGE<sub>1</sub> with NO detection reagents. 35 µM of Prostanit or PGE<sub>1</sub> were incubated either with cell culture medium, or with PBS with 130 mM of NaBH<sub>4</sub> for 10 min, after which the concentration of NO<sub>2</sub><sup>-</sup> was determined using the Griess reaction (N=3 experiments). \*, a statistically significant difference from cell culture medium; \*\*, a statistically significant difference from Prostanit without cells, ANOVA with the Tukey post-test, p<0.05.

|                             | Optical Density of<br>the Griess<br>Reaction,<br>mean±S.E. |
|-----------------------------|------------------------------------------------------------|
| Cell culture<br>medium      | 0.069±0.003                                                |
| PGE <sub>1</sub>            | 0.077±0.002 *                                              |
| Prostanit                   | 0.081±0.001 *                                              |
| Prostanit +cells            | 0.898±0.011 *, **                                          |
| Prostanit+NaBH <sub>4</sub> | 0.082±0.002 *                                              |
